# Supplementary material for: Facile synthesis of aminated indole-based porous organic polymer for highly selective capture of CO2 by the coefficient effect of π–π-stacking and hydrogen bonding
Source: Royal Society of Chemistry journal article supplement (doi:10.1039/c9ra01532a), 2019-01-01
Supplement: c9ra01532a1.pdf [file c9ra01532a1.pdf]

## *Supporting Information*

### **Facile Synthesis Aminated Indole-based Porous Organic Polymer for Highly Selective Capture CO<sub>2</sub> by the Coefficient Effect of $\pi$ - $\pi$ -stacking and Hydrogen Bonding**

*Qiang He\**, *Yi Xu*, and *Xiaoqiang Yang*

School of Aviation Engineering Institute, Civil Aviation Flight University of China,  
Guanghan , 618307, People's Republic of China.

Corresponding Authors. E-mail: [heqiangxy@126.com](mailto:heqiangxy@126.com)

# Table of contents

|                                                                                                                                       |     |
|---------------------------------------------------------------------------------------------------------------------------------------|-----|
| 1. Main materials.....                                                                                                                | S3  |
| 2. Measurements .....                                                                                                                 | S3  |
| 3. Preparation of porous organic polymer material PIN-NH <sub>2</sub> aerogel .....                                                   | S4  |
| 4. Structural characterization of PIN-NH <sub>2</sub> .....                                                                           | S4  |
| 5. BET specific surface area plots of PIN-NH <sub>2</sub> .....                                                                       | S5  |
| 6. The XRD of porous organic polymer PIN-NH <sub>2</sub> .....                                                                        | S6  |
| 7. Thermal stability of porous organic polymer PIN-NH <sub>2</sub> .....                                                              | S7  |
| 8. Isothermic heat of CO <sub>2</sub> adsorption for PIN-NH <sub>2</sub> .....                                                        | S7  |
| 9. Gas adsorption isotherms of PIN-NH <sub>2</sub> .....                                                                              | S8  |
| 10. The comparison the CO <sub>2</sub> capacity, CO <sub>2</sub> /N <sub>2</sub> , CO <sub>2</sub> /CH <sub>4</sub> selectivity ..... | S9  |
| 11. The dynamic breakthrough separation tests.....                                                                                    | S10 |
| 12. The adsorption measurements.....                                                                                                  | S10 |
| 13. Simulation method .....                                                                                                           | S12 |
| 14. References.....                                                                                                                   | S13 |

## **1. Main materials**

4-Aminoindole (97%), 1,2-dichloroethane (AR), iron (III) chloride ( $\text{FeCl}_3$ , AR), formaldehyde dimethyl acetal (AR), methanol (AR), sulfuric acid ( $\text{H}_2\text{SO}_4$ , 98%), anhydrous sodium sulfite ( $\text{Na}_2\text{SO}_3$ , AR), sodium hydroxide (NaOH, AR), hydrochloric acid (HCl, 12 M) and acetone (AR) were purchased from Shanghai Reagent (Shanghai, China). 4-Aminoindole was stored in a refrigerator at 4 °C. Other reagents were of analytical grade and used without any further purification. The rest of the materials and reagents were obtained from different commercial sources and used without further purification.

## **2. Measurements**

FT-IR spectrum was recorded on a Nicolet 6700 FTIR spectrometer. Solid-state cross-polarization magic-angle-spinning (CP/MAS) NMR spectrum was recorded on a Bruker Avance III 400 NMR spectrometer. The elemental analysis characterization technique was performed using a Vario EL III apparatus. Thermogravimetric analysis (TGA) was performed on a Setarma TG-92 at a heating rate of 10 °C/min under nitrogen atmosphere. Scanning electron microscopy (SEM) was recorded on an S-4800 (Hitachi Ltd) field emission scanning electron microscope. Morphological observation was performed with a Tecnai G2 F20 S-TWIN (FEI Company) transmission electron microscope. The nitrogen adsorption and desorption isotherms were measured at 77 K using a Micromeritics AR-JW-BK112 instrument. The sample was treated at 120 °C for 24 h before the measurement. The surface area was calculated by Brunauer-Emmett-Teller (BET)

equation ( $0.01 < P/P_0 < 0.1$ ). The pore-size-distribution (PSD) curve was obtained from the adsorption branch using non-local density functional theory (NL-DFT) method.

### 3. Preparation of porous organic polymer material PIN-NH<sub>2</sub> aerogel

4-Aminoindole (0.528 g, 4 mmol) was added to anhydrous 1,2-dichloroethane (40 mL) under a flow of N<sub>2</sub>, followed by formaldehyde dimethyl acetal (0.4566 g, 6 mmol). FeCl<sub>3</sub> (1.30 g, 8 mmol) was added and heated to 80 °C for 18 h (Scheme S1). The solid product was collected by filtration and washed with methanol, HCl (10%) and deionized water to remove the residual FeCl<sub>3</sub>. The product was further purified by soxhlet extraction in methanol, dried in vacuum at 60 °C for 24 h.

FT-IR spectrum (KBr pellet, cm<sup>-1</sup>): 3438, 2999, 2927, 1630, 1480, 1388, 1027; Anal. calcd for (C<sub>9</sub>H<sub>7</sub>N<sub>2</sub>)<sub>n</sub>: C, 75.52; H, 4.89; N, 19.58; found: C, 76.29; H, 4.02; N, 19.69.

### 4. Structural characterization of PIN-NH<sub>2</sub>

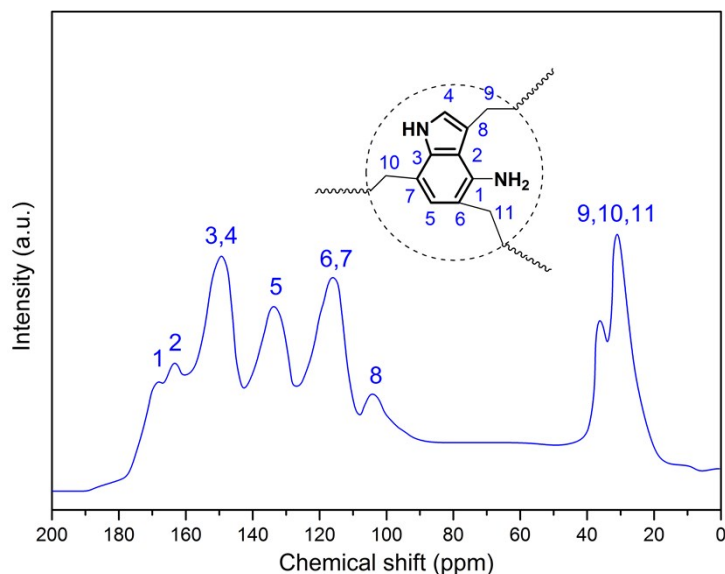

**Figure S1.** <sup>13</sup>C CP/MAS NMR spectrum of PIN-NH<sub>2</sub>.

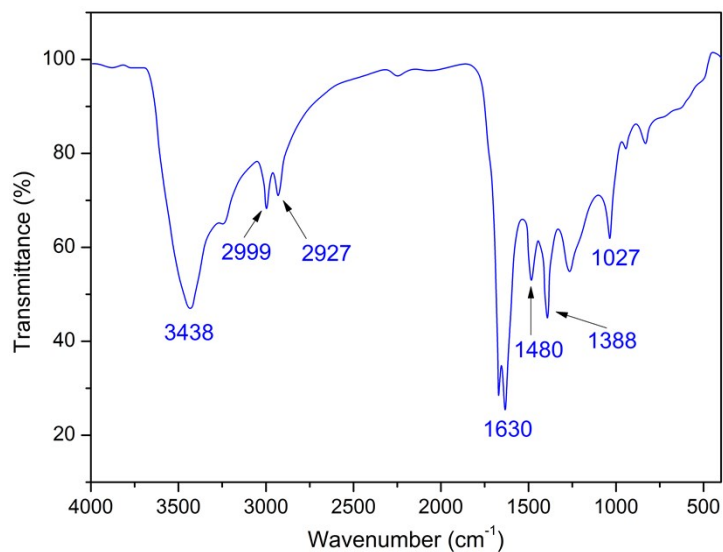

**Figure S2.** FT-IR spectrum of PIN-NH<sub>2</sub>.

### 5. BET specific surface area plots of PIN-NH<sub>2</sub>

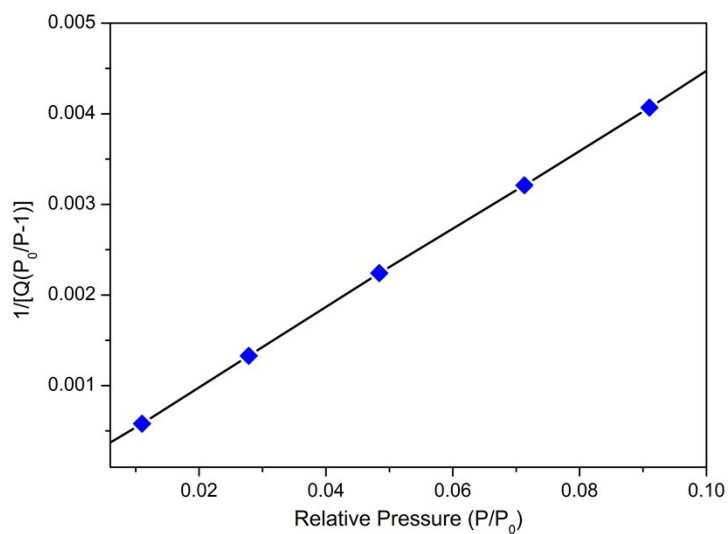

**Figure S3.** BET specific surface area plots of PIN-NH<sub>2</sub>.

### 6. The XRD of porous organic polymer PIN-NH<sub>2</sub>

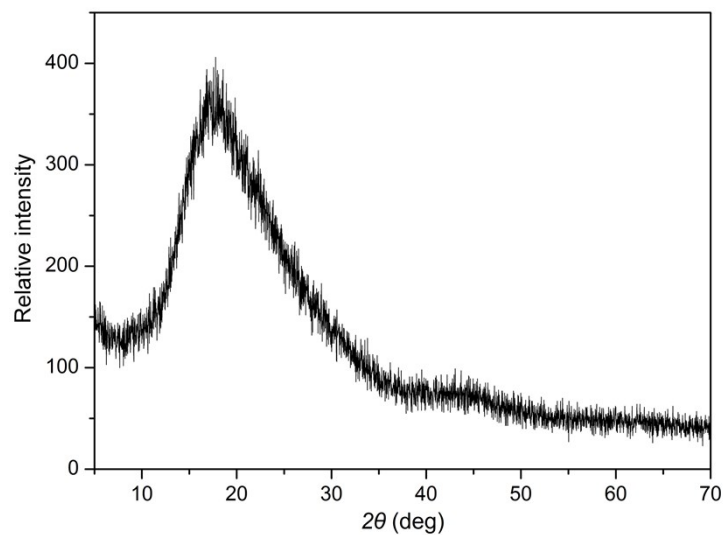

**Figure S4.** The XRD pattern of porous organic polymer PIN-NH<sub>2</sub>.

### 7. Thermal stability of porous organic polymer PIN-NH<sub>2</sub>

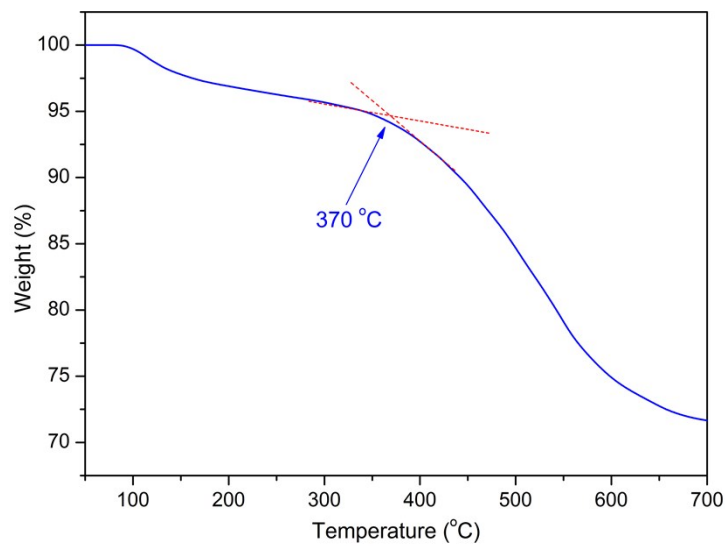

**Figure S5.** TG curve of PIN-NH<sub>2</sub> in nitrogen.

### 8. Isothermic heat of CO<sub>2</sub> adsorption for PIN-NH<sub>2</sub>

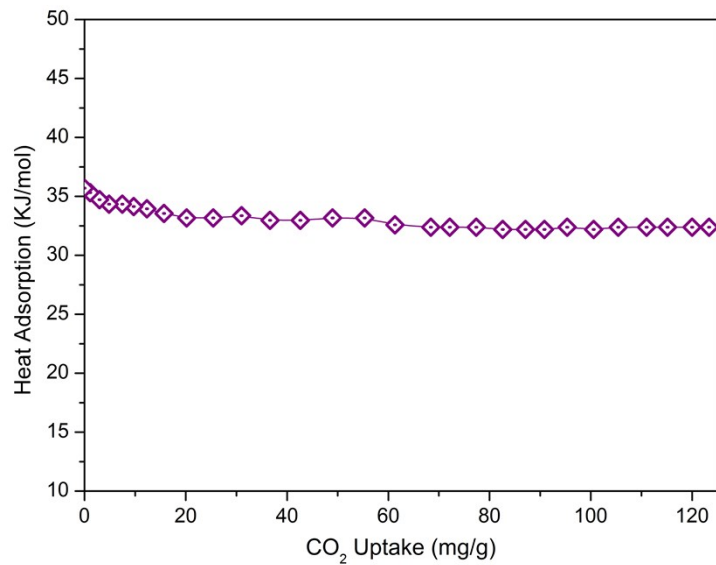

**Figure S6.** Isothermic heat of CO<sub>2</sub> adsorption for PIN-NH<sub>2</sub>.

### 9. Gas adsorption isotherms of PIN-NH<sub>2</sub>

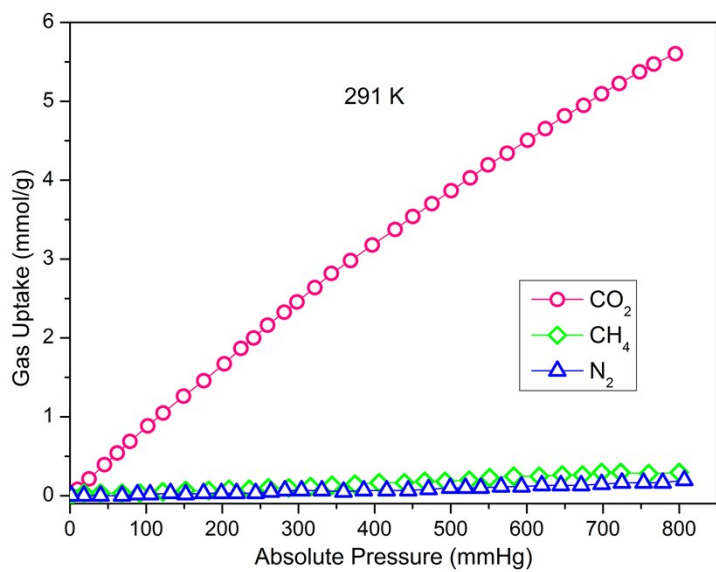

**Figure S7.** Gas adsorption isotherms of PIN-NH<sub>2</sub> at 291 K.

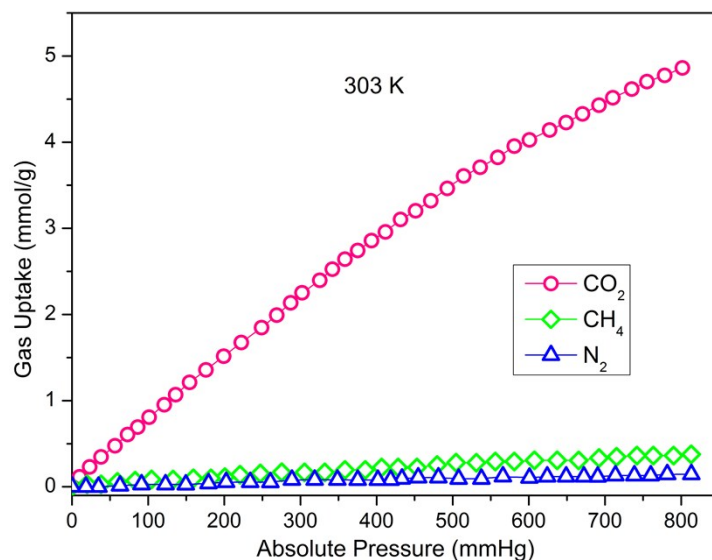

**Figure S8.** Gas adsorption isotherms of PIN-NH<sub>2</sub> at 303 K.

### 10. The comparison the CO<sub>2</sub> capacity, CO<sub>2</sub>/N<sub>2</sub>, CO<sub>2</sub>/CH<sub>4</sub> selectivity

**Table S1.** The comparison the CO<sub>2</sub> capacity, CO<sub>2</sub>/N<sub>2</sub>, CO<sub>2</sub>/CH<sub>4</sub> selectivity.

| adsorbents                | CO <sub>2</sub> capacity     | CO <sub>2</sub> /N <sub>2</sub> selectivity | CO <sub>2</sub> /CH <sub>4</sub> selectivity | reference |
|---------------------------|------------------------------|---------------------------------------------|----------------------------------------------|-----------|
| <b>PIN-NH<sub>2</sub></b> | 27.7 wt% (273 K, 1 bar)      | 137 (273 K, 1 bar)                          | 34 (273 K, 1 bar)                            |           |
| <b>HKUST-1 (CuBTC)</b>    | 10.7 mmol/kg (298 K, 35 bar) | -                                           | 5 (303 K, 1 bar)                             | [1]       |
| <b>MAPOP-1</b>            | 12.6 wt% (273 K, 1 bar)      | -                                           | 4.1 (273 K, 1 bar)                           | [2]       |
| <b>MAPOP-2</b>            | 12.2 wt% (273 K, 1 bar)      | -                                           | 4.1 (273 K, 1 bar)                           | [2]       |
| <b>MAPOP-3</b>            | 11.6 wt% (273 K, 1 bar)      | -                                           | 4.3 (273 K, 1 bar)                           | [2]       |
| <b>MAPOP-4</b>            | 13.5 wt% (273 K, 1 bar)      | -                                           | 4.8 (273 K, 1 bar)                           | [2]       |
| <b>PINAA</b>              | 5.83 mmol/g (273 K, 1 bar)   | 83 (273 K, 1 bar)                           | 22 (273 K, 1 bar)                            | [3]       |
| <b>PAA</b>                | 3.25 mmol/g (273 K, 1 bar)   | 81 (273 K, 1 bar)                           | 20 (273 K, 1 bar)                            | [3]       |
| <b>PIN</b>                | 4.92 mmol/g (273 K, 1 bar)   | 33 (273 K, 1 bar)                           | 17 (273 K, 1 bar)                            | [3]       |
| <b>HTP-B</b>              | 10.3 wt % (273 K, 1 bar)     | 16 (273 K, 1 bar)                           | -                                            | [4]       |



## 11. The dynamic breakthrough separation tests

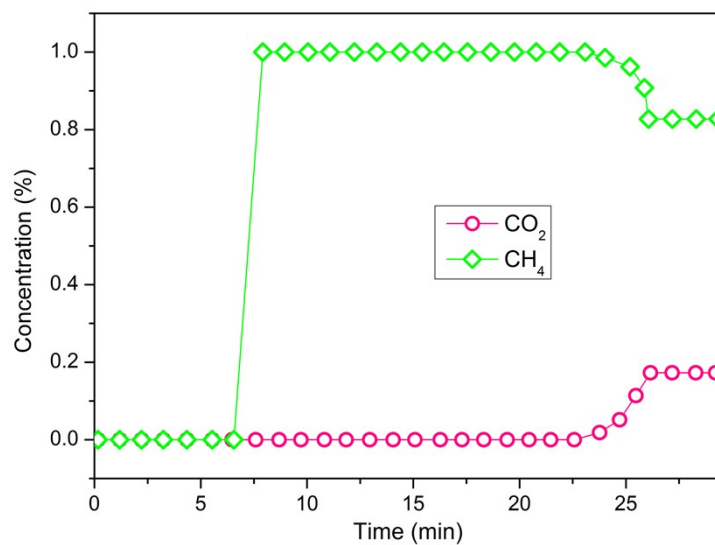

**Figure S9.** The dynamic breakthrough separation curves for CO<sub>2</sub>/CH<sub>4</sub> mixture gas.

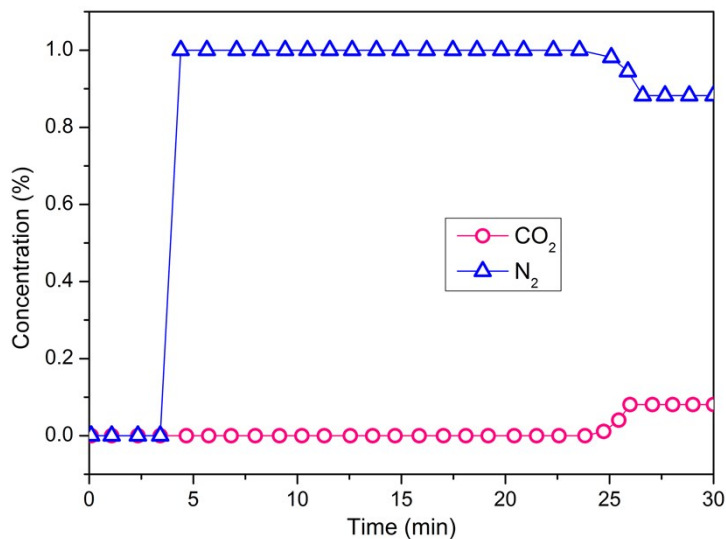

**Figure S10.** The dynamic breakthrough separation curves for CO<sub>2</sub>/N<sub>2</sub> mixture gas.

## 12. The adsorption measurements

The CO<sub>2</sub>, N<sub>2</sub> and CH<sub>4</sub> adsorption measurements were carried out using a Micromeritics AR-JW-BK112 analyzer at 273, 291 and 303 K and up to 1 bar. The temperature during

adsorption and desorption was kept constant using a circulator. Highly pure gases CO<sub>2</sub> (99.999%), N<sub>2</sub> (99.999%) and CH<sub>4</sub> (99.99%) were employed for the measurements. The Clausius-Clapeyron equation was employed to calculate the enthalpies of adsorption for CO<sub>2</sub> on the network. The data was fit using the equation:  $(\ln P)_n = -(Q_{st}/R)(1/T)+C$ , where  $P$  is the pressure,  $n$  is the amount adsorbed,  $T$  is the temperature,  $R$  is the universal gas constant and  $C$  is a constant. The isosteric heat of adsorption  $Q_{st}$  was subsequently obtained from the slope of plots of  $(\ln P)_n$  as a function of  $1/T$ .<sup>5</sup> The adsorption selectivities have been defined as  $S = (x_i/y_i)/(x_j/y_j)$ , where  $x_i$  and  $y_i$  ( $x_j$  and  $y_j$ ) are the molar fractions of component 1 (component 2) in the adsorbed and bulk phases, respectively.<sup>6</sup> In the calculation, the ratio of CO<sub>2</sub>/N<sub>2</sub> is 15/85 and the ratio of CO<sub>2</sub>/CH<sub>4</sub> is 5/95, which is the typical composition of flue gas and natural gas, respectively. The regeneration experiments were carried out with an Micromeritics AR-JW-BK112 analyzer, the sample was saturated with CO<sub>2</sub> up to 1 bar at 291 K. The recovered adsorbent was evacuated at room temperature for 10 min and then reused for adsorption. Breakthrough curve measurements were performed using a home-made gas-flow system and the experiment is conducted as follows: The adsorbent PIN-NH<sub>2</sub> was filled into the column with a length of 150 mm and an internal diameter of 5 mm. And before the test, the column was activated in flow of Ar for 24 h. The pressure in the column was maintained at 3.1 MPa. The experiments were performed at 298 K. For the CO<sub>2</sub>/N<sub>2</sub> mixture gas, the gas fraction was CO<sub>2</sub>/N<sub>2</sub>=15/85 (v/v) with a space velocity of 5 min<sup>-1</sup>. For the CO<sub>2</sub>/CH<sub>4</sub>, the gas component was CO<sub>2</sub>/CH<sub>4</sub>=5/95 (v/v) with a space velocity of 5 min<sup>-1</sup>. The flow rates of

all of the pure gases were regulated by mass flow controllers (0-100 mL min<sup>-1</sup>). The gas mixture was first sent to the gas chromatograph through bypass line and measured its component before the breakthrough measurements. The relative amounts of the effluent gases passing through the column were monitored by GC.

### 13. Simulation method

To illustrate the molecular mechanism, we used density functional theory (DFT)<sup>7,8</sup> to investigate the interaction of the PIN-NH<sub>2</sub> model compound with CO<sub>2</sub>. It was calculated at the M06-2X level with the aug-cc-pVDZ basis set and the resolution-of-identity spin-component-scaling Möller-Plesset second-order perturbation theory (RI-scs-MP2) level with the aug-cc-pVTZ basis set.<sup>9-11</sup> The geometries were fully optimized without symmetry constraints at each calculation level. The M06-2X functional (hybrid-meta GGA with dispersion correction) has shown good performance in the investigation of the dispersion interaction as well as the electrostatic interaction (H-bonding, H- $\pi$  interaction,  $\pi$ - $\pi$  interaction, additional electrostatic and induction energies of neutral and charged dimeric systems).<sup>12,13</sup> Single point calculations using the RI-coupled cluster theory with single, double and perturbative triple excitations (RI-CCSD(T)) were performed by employing the aVTZ and aug-cc-pVQZ (aVQZ) basis sets at the RI-scs-MP2/aVTZ geometries. The CO<sub>2</sub>-BEs were calculated at the complete basis set (CBS) limit at the RI-CCSD(T) level with the aVTZ and aVQZ basis sets by employing the extrapolation approximation.<sup>14,15</sup> The complete basis set energies were S-19 estimated with the extrapolation scheme utilizing the electron correlation error proportional to N-3 for the

aug-cc-pVNZ basis set (N=3:T, N=4:Q). It is generally known that the zero-point-energy (ZPE)-uncorrected BE(- $\Delta E_e$ ) is closer to the experimental CO<sub>2</sub>-adsorption enthalpy ( $\Delta H_{ads}$ ) than the ZPE-corrected BE(- $\Delta E_0$ ).<sup>16,17</sup> Therefore, the values of - $\Delta E_e$  are reported as the CO<sub>2</sub>-BEs.

#### 14. References

- [1] J. Liu, P. K. Thallapally, B. P. McGrail, D. R. Brown, *J. Chem. Soc. Rev.* 2012, 41, 2308.
- [2] X. S. Ding, H. Li, Y. C. Zhao and B. H. Han, *Polym. Chem.* 2015, 6, 5305.
- [3] L. Yang, G. Chang and D. Wang, *ACS Appl. Mater. Interfaces* 2017, 9, 15213.
- [4] C. Zhang, P. C. Zhu, L. X. Tan, L. N. Luo, Y. Liu, J. M. Liu, S. Y. Ding, B. X. Tan, L. Yang and H. B. Xu, *Polymer*, 2016, 82, 100.
- [5] Dunne JA, Mariwala R, Rao M, Sircar S, Gorte RJ, Myers AL (1996) Calorimetric heats of adsorption and adsorption isotherms. 1. O<sub>2</sub>, N<sub>2</sub>, Ar, CO<sub>2</sub>, CH<sub>4</sub>, C<sub>2</sub>H<sub>6</sub>, and SF<sub>6</sub> on silicalite. *Langmuir* 12:5888-5895
- [6] Yin Y, Tan P, Liu XQ, Zhu J, Sun LB (2014) Constructing a confined space in silica nanopores: an ideal platform for the formation and dispersion of cuprous sites. *J Mater Chem A* 2:3399-3406
- [7] Altarawneh, S.; Behera, S.; Jena, P.; El-Kaderi, H. M. New Insights into Carbon Dioxide Interactions with Benzimidazole-Linked Polymers. *Chem. Commun.* 2014, 50, 3571-3574.
- [8] Mercado, R.; Vlaisavljevich, B.; Lin, L.; Lee, K.; Lee, Y.; Mason, J. A.; Xiao, D. J.; Gonzalez, M. I.; Kapelewski, M. T.; Neaton J. B.; Smit, B. Force Field Development from Periodic Density Functional Theory Calculations for Gas Separation Applications Using Metal-Organic Frameworks. *J. Phys. Chem. C* 2016, 120, 12590-12604.

- [9] Gerenkamp, M.; Grimme, S. Spin-Component Scaled Second-Order Møller-Plesset Perturbation Theory for the Calculation of Molecular Geometries and Harmonic Vibrational Frequencies. *Chem. Phys. Lett.*, 2004, 392, 229-235. S-20
- [10] Zhao, Y.; Truhlar, D. G. Comparative DFT Study of van der Waals Complexes: Rare-Gas Dimers, Alkaline-Earth Dimers, Zinc Dimer, and Zinc-Rare-Gas Dimers. *J. Phys. Chem. A*, 2006, 110, 5121-5129.
- [11] Grimme, S. Improved second-order Møller-Plesset Perturbation Theory by Separate Scaling of Parallel- and Antiparallel-Spin Pair Correlation Energies. *J. Chem. Phys.*, 2003, 118, 9095-9102.
- [12] Kolaski, M.; Kumar, A.; Singh, N. J.; Kim, K. S. Differences in Structure, Energy, and Spectrum between Neutral, Protonated, and Deprotonated Phenol Dimers: Comparison of Various Density Functionals with AB Initio Theory. *Phys. Chem. Chem. Phys.*, 2011, 13, 991-1001.
- [13] Lee, H. M.; Youn, I. S.; Saleh, M.; Lee, J. W.; Kim, K. S. Interactions of CO<sub>2</sub> with Various Functional Molecules. *Phys. Chem. Chem. Phys.*, 2015, 17, 10925-10933.
- [14] Min, S. K.; Lee, E. C.; Lee, H. M.; Kim, D. Y.; Kim, D.; Kim, K. S. Complete Basis Set Limit of Ab Initio Binding Energies and Geometrical Parameters for Various Typical Types of Complexes. *J. Comput. Chem.*, 2008, 29, 1208-1221.
- [15] Helgaker, T.; Klopper, W.; Koch, H. Noga, J. Basis-Set Convergence of Correlated Calculations on Water. *J. Chem. Phys.*, 1997, 106, 9639-9646.
- [16] Saleh, M.; Lee, H. M.; Kemp, K. C.; Kim, K. S. Highly Stable CO<sub>2</sub>/N<sub>2</sub> and CO<sub>2</sub>/CH<sub>4</sub> Selectivity in Hyper-Cross-Linked Heterocyclic Porous Polymers. *ACS Appl. Mater. Interfaces* 2014, 6, 7325-7333.

[17] Vaidhyanathan, R.; Iremonger, S. S.; Shimizu, G. K. H.; Boyd, P. G.; Alavi, S.; Woo, T. K.  
Direct Observation and Quantification of CO<sub>2</sub> Binding Within an Amine-Functionalized Nanoporous  
Solid. *Science*, 2010, 330, 650-653.
